# Supplementary material
Source: publisher figshare collection journal article supplement (https://tandf.figshare.com/articles/dataset/_/4736341)
Supplement: Supplementary file 1 [file 1]

JOURNAL OF VERTEBRATE PALEONTOLOGY

SUPPLEMENTARY DATA 1

Osteology and relationships of *Colymbosaurus* Seeley 1874, based on new material of *C. svalbardensis* from the Slottsmøya Member, Agardhfjellet Formation of central Spitsbergen

AUBREY J. ROBERTS,<sup>\*,1,2</sup> PATRICK S. DRUCKENMILLER,<sup>3,4</sup> LENE L. DELSETT<sup>2</sup> and  
JØRN H. HURUM<sup>2</sup>

<sup>1</sup>The National Oceanography Centre, University of Southampton, Southampton, Hampshire  
SO14 3ZH, U.K., [ajr1g13@soton.ac.uk](mailto:ajr1g13@soton.ac.uk);

<sup>2</sup>Natural History Museum, University of Oslo, 0562, Norway, [l.l.delsett@nhm.uio.no](mailto:l.l.delsett@nhm.uio.no),  
[j.h.hurum@nhm.uio.no](mailto:j.h.hurum@nhm.uio.no);

<sup>3</sup>University of Alaska Museum, 907 Yukon Drive, Fairbanks, Alaska, 99775, U.S.A.,  
[psdruckenmiller@alaska.edu](mailto:psdruckenmiller@alaska.edu);

<sup>4</sup>Department of Geoscience, University of Alaska Fairbanks, 900 Yukon Drive, Fairbanks,  
Alaska, 99775, U.S.A.

\*Corresponding author.

## SUPPLEMENTARY DATA 1

### Additional Information On PMO 222.663

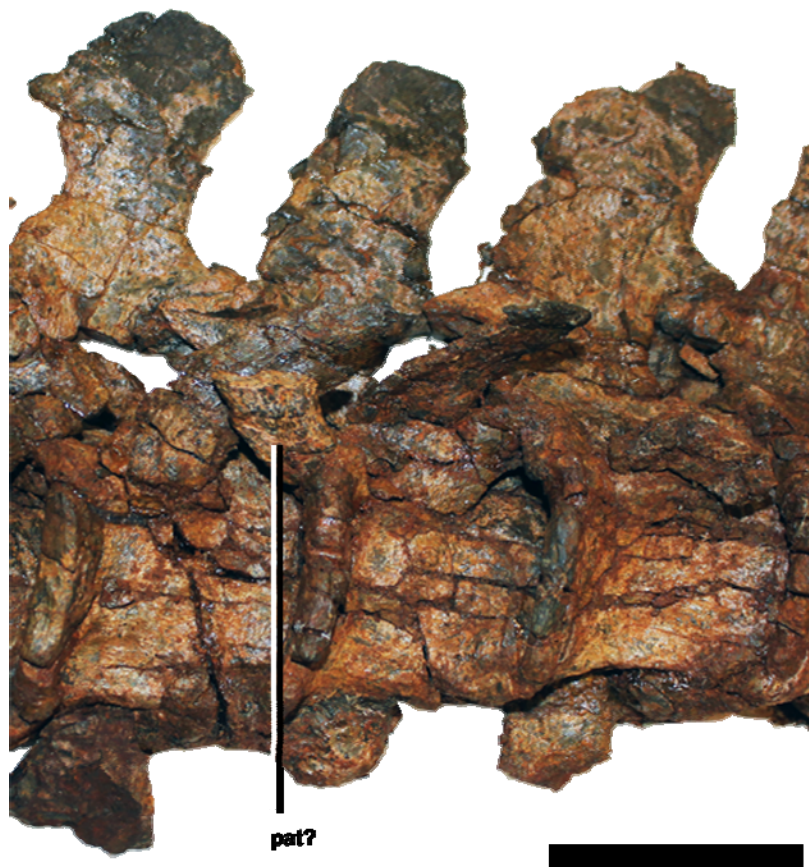

FIGURE 1S. A detailed image of the anterior process on the sixth caudal vertebra in the articulated series of PMO 222.663 in lateral view. **Abbreviations:** **pat?**, pathology? Scale bar equals 5 cm.

### *Colymbosaurus* Specimens In UK Museums

Eighteen propodials from the Kimmeridge Clay Formation were measured at UK museums, the measurements are summarized in Table S1. Note that two propodials were included for a single individual (OUM J.3300) and was included to show individual variability and differences if any between the humerus and femur.

TABLE S1. A selection of observations on cryptoclidid propodials from the Kimmeridge Clay Formation (United Kingdom) examined in this study. The presence/absence and extent of a bisecting anteroposteriorly oriented ridge on the distal end of the propodials are noted, along with other remarks. **Abbreviations:** **CAMSM**, Sedgwick Museum of Earth Science, Cambridge University, Cambridge, U.K.; **MANCH**, The Manchester Museum, Manchester, U.K.; **NHMUK**, Natural History Museum, London, U.K.; **OUM**, Oxford University Museum of Natural History, Oxford, U.K.; **PMO**, Paleontological Museum Oslo, University of Oslo, Oslo, Norway; **YORKM**, York Museum and Art Gallery, York, U.K.

|                 |         | Ridge           |                                    |
|-----------------|---------|-----------------|------------------------------------|
| Specimen number | Humerus | observations    | Remarks                            |
| NHMUK R31787    | Right   | Present         | Postaxial flange broken            |
| NHMUK R10062    | Right   | Absent          |                                    |
| OUM J.13815     | Left    | On ulna facet   | Reconstructed middle               |
| OUM J.3300/38   | Left    | Present         |                                    |
| OUM J.9290      | Right   | On radius facet |                                    |
| CAMSM J68344    | Left    | Absent          | Juvenile?                          |
| YORKM           |         |                 |                                    |
| 2005.2224.2     | Left    | Present         | Compressed distal end              |
| PMO 222.663     | Right   | Absent          | Ulna fused to distal end           |
|                 |         | Femur           |                                    |
| OUM J.13827     | Right   | Absent          |                                    |
| OUM J.3300/45   | Left    | Present         |                                    |
| CAMSM J29654-   |         |                 |                                    |
| 91              | Left    | Present         | Postaxial flange broken            |
|                 |         |                 | Postaxial flange and proximal edge |
| CAMS J.59736-43 | Right   | Present         | broken                             |
| CAMSM J29740    | Right   | On fibula facet |                                    |

|               |                |                 |                      |
|---------------|----------------|-----------------|----------------------|
| CAMSM J.29738 | Left           | Present         |                      |
| MANCH LL.5513 | Right          | Absent          |                      |
| MANCH LL.5514 | Left           | On fibula facet |                      |
| PMO 222.663   | Right          | Absent          |                      |
| PMO A27745    | Right          | Absent          |                      |
| PMO 216.838   | Left           | Absent          |                      |
| <hr/>         |                |                 |                      |
|               | Unidentifiable |                 |                      |
| OUM J.13826   | X              | Present         | Proximal end missing |
| OUM J.13841   | x              | Present         | Proximal end missing |
| YORKM         |                |                 |                      |
| 2005.2223.1   | X              | Absent          | Proximal end missing |

## Phylogenetic Methods

As the character list is the same as that used in Benson and Druckenmiller (2014), it is not included here. The character list and original matrix is available freely as online supplementary material with that publication. A number of scores were changed for the cryptoclidid plesiosaur taxa examined by *AJR* and *PSD* from the Slottsmøya Member, Kimmeridge Clay Formation (UK) and Oxford Clay Formation. Following Benson and Druckenmiller (2014), *Spitrasaurus* spp. was scored as a composite of the two species *S. wensaasi* and *S. larseni*. The following changes were made in these taxa (char/original score→new score):

- *Muraenosaurus leedsi*: (183/1→0) coding mistake.
- *Kimmerosaurus langhami*: (151/1→0) based on own observations of referred material and holotype (NHMUK R)
- *Colymbosaurus megadeirus*: (142/?→1) (Benson and Bowdler, 2014), (144/?→1) (Benson and Bowdler, 2014), (189/0→1), (234/1→0) no preaxial element preserved, (240/1→0) the curvature of the long axis of the femur is straight or almost straight. (243/2→0) not a valid character state due to significant variation
- *Djupedalia engeri*: (7/0→?), (13/0→?), (200/1→0) do not meet along the midline.
- *Spitrasaurus* spp.: (13/0→?), (159/1→?) not possible to confirm due to the preservation of the vertebrae, (200/1→0) do not meet along the midline.

**Settings used in TNT (V1.1)**—The original data matrix by Benson and Druckenmiller (2014) was run in TNT (V1.1; Goloboff et al., 2008), using first the New Technology analysis – Ratchet. The ‘random addition sequences’ was set to 5000, four iterations were utilized, random seed was set at 1 and all trees were kept. The resulting trees from this initial analysis

was then analyzed using TBR. The consistency and retention indexes were generated using the “stats.run” script and the bremer support values were found using the “bremer.run” script, both of which can be found on the webpage for TNT: <http://phylo.wikidot.com/tntwiki>. A resampling analysis was run on all data sets using bootstrap set at 1000 replicates, which yielded poor (<50) support values within Cryptoclididae.

#### LITERATURE CITED

- Benson, R. B. J., and T. Bowdler. 2014. Anatomy of *Colymbosaurus megadeirus* (Reptilia, Plesiosauria) from the Kimmeridge Clay Formation of the U.K., and high diversity among Late Jurassic plesiosauroids. *Journal of Vertebrate Paleontology* 34:1053–1071.
- Benson, R. B. J., and P. S. Druckenmiller. 2014. Faunal turnover of marine tetrapods of the Jurassic-Cretaceous transition. *Biological Reviews* 89:1–23.
- Goloboff, P., S. Farris, and K. Nixon. 2008. TNT, a free program for phylogenetic analysis. *Cladistics* 24:774–786.
